# Supplementary material for: Concurrent use of statins decreases major bleeding and intracerebral hemorrhage in non-valvular atrial fibrillation patients taking direct oral anticoagulants—A nationwide cohort study
Source: Frontiers journal article supplement (doi:10.3389/fcvm.2022.969259), 2022-08-08
Supplement: Data_Sheet_1.PDF [file Data_Sheet_1.PDF]

**Table S1. Statin Classification According to Intensity**

| Low-to-moderate-intensity Statins | High-intensity Statins   |
|-----------------------------------|--------------------------|
| Fluvastatin 20 to 80 mg           | Atorvastatin 40 to 80 mg |
| Lovastatin 20 to 40 mg            | Rosuvastatin 20 to 40 mg |
| Atorvastatin 10 to 20 mg          |                          |
| Pitavastatin 1 to 4 mg            |                          |
| Pravastatin 10 to 80 mg           |                          |
| Rosuvastatin 5 to 10 mg           |                          |
| Simvastatin 10 to 40 mg           |                          |

**Table S2. Risk Scoring System for Stroke and Bleeding**

| Risk Scoring system                             | Point if present |
|-------------------------------------------------|------------------|
| <b>CHA<sub>2</sub>DS<sub>2</sub>-VASc score</b> |                  |
| Congestive heart failure                        | 1                |
| Hypertension                                    | 1                |
| Age $\geq$ 65                                   | 1                |
| Age $\geq$ 75                                   | 2                |
| Diabetes mellitus                               | 1                |
| Prior stroke or transient ischemic attack       | 2                |
| Vascular disease*                               | 1                |
| Female                                          | 1                |
| <b>HAS-BLED score</b>                           |                  |
| Hypertension                                    | 1                |
| Chronic kidney disease                          | 1                |
| Liver disease                                   | 1                |
| Stroke                                          | 1                |
| History of bleeding                             | 1                |
| Age>65                                          | 1                |
| Antiplatelet drug using                         | 1                |
| Non-steroidal anti-inflammation drug using      | 1                |
| Labile INR (not applicable in our study)        | 1                |

\*include: myocardial infarction, peripheral vascular disease, aortic plaque, receiving percutaneous coronary intervention or coronary artery bypass surgery; INR: international normalized ratio

**Table S3. Definitions and codes of comorbidities and outcomes**

|                                    | <b>Enhanced ICD-9-CM</b>                                                                           | <b>ICD-10</b>                                                                             | <b>Order code</b>                              |
|------------------------------------|----------------------------------------------------------------------------------------------------|-------------------------------------------------------------------------------------------|------------------------------------------------|
| Atrial fibrillation                | 427.31                                                                                             | I48.0, I48.2, I48.91                                                                      |                                                |
| Hypertension                       | 401, 402                                                                                           | I10-I16                                                                                   |                                                |
| Myocardial infarction              | 410.x, 412.x                                                                                       | I21.x, I22.x, I25.2                                                                       |                                                |
| Congestive heart failure           | 398.91, 402.01, 402.11, 402.91, 404.01, 404.03, 404.11, 404.13, 404.91, 404.93, 425.4–425.9, 428.x | I09.9, I11.0, I13.0, I13.2, I25.5, I42.0, I42.5–I42.9, I43.x, I50.x, P29.0                |                                                |
| Aortic plaque                      | 440                                                                                                | I70                                                                                       |                                                |
| Percutaneous coronary intervention |                                                                                                    |                                                                                           | 33076A, 33076B, 33077A, 33077B, 33078A, 33078B |
| Coronary artery bypass surgery     |                                                                                                    |                                                                                           | 68023A, 68023B, 68024A, 68024B, 68025A, 68025B |
| Peripheral vascular disease        | 093.0, 437.3, 440.x, 441.x, 443.1–443.9, 47.1, 557.1, 557.9, V43.4                                 | I70.x, I71.x, I73.1, I73.8, I73.9, I77.1, I79.0, I79.2, K55.1, K55.8, K55.9, Z95.8, Z95.9 |                                                |
| Cerebrovascular disease            | 362.34, 430.x–438.x                                                                                | G45.x, G46.x, H34.0, I60.x–I69.x                                                          |                                                |
| Ischemic stroke                    | 433-434, 436, 852, 853                                                                             | I67.89, I63-I64, G458-459, S01.90XA, S06.4X0A-S06.4X9A, S06.5X0A-S06.5X9A, S06.6X0A-      |                                                |

|                                       |                                                                                                           |                                                                                                                  |  |
|---------------------------------------|-----------------------------------------------------------------------------------------------------------|------------------------------------------------------------------------------------------------------------------|--|
|                                       |                                                                                                           | S06.6X9A, S06.340A-S06.349A,<br>S06.350A-S06.359A,<br>S06.360A-S06.369A                                          |  |
| Transient ischemic attack             | 435                                                                                                       | G45                                                                                                              |  |
| Hemiplegia or paraplegia              | 334.1, 342.x, 343.x, 344.0– 344.6,<br>344.9                                                               | G04.1, G11.4, G80.1, G80.2, G81.x,<br>G82.x, G83.0–G83.4, G83.9                                                  |  |
| Dementia                              | 290.x, 294.1, 331.2                                                                                       | F00.x–F03.x, F05.1, G30.x, G31.1                                                                                 |  |
| Diabetes mellitus (DM)                | 250                                                                                                       | E10.0;E10.1;E10.9;E11.0;E11.1;<br>E11.9                                                                          |  |
| Diabetes with complications           | 250.4–250.7                                                                                               | E10.2–E10.5, E10.7, E11.2–E11.5,<br>E11.7, E12.2–E12.5, E12.7, E13.2–<br>E13.5, E13.7, E14.2–E14.5, E14.7        |  |
| Chronic pulmonary disease             | 416.8, 416.9, 490.x–505.x, 506.4,<br>508.1, 508.8                                                         | I27.8, I27.9, J40.x–J47.x, J60.x–J67.x,<br>J68.4, J70.1, J70.3                                                   |  |
| Chronic obstructive pulmonary disease | 490,491.0,491.1,491.2,491.20,<br>491.21, 491.22, 491.8, 491.9,<br>492.0, 492.8, 494, 494.0, 494.1,<br>496 | J40, J41.0, J41.1, J41.8, J42, J43.0,<br>J43.1, J43.2, J43.8, J43.9, J44.0,<br>J44.1, J44.9, J47.0, J47.1, J47.9 |  |
| Peptic ulcer disease                  | 531.x–534.x                                                                                               | K25.x–K28.x                                                                                                      |  |
| Mild liver disease                    | 070.22, 070.23, 070.32, 070.33,<br>070.44, 070.54, 070.6, 070.9,<br>570.x,571.x,573.3,573.4,573.8,        | B18.x, K70.0–K70.3, K70.9, K71.3–<br>K71.5,K71.7,K73.x,K74.x,K76.0,<br>K76.2–K76.4,K76.8,K76.9,Z94.4             |  |

|                                                                                    |                                                           |                                                                                                                                 |  |
|------------------------------------------------------------------------------------|-----------------------------------------------------------|---------------------------------------------------------------------------------------------------------------------------------|--|
|                                                                                    | 573.9                                                     |                                                                                                                                 |  |
| Moderate or severe liver disease                                                   | 456.0–456.2, 572.2–572.8                                  | I85.0, I85.9, I86.4, I98.2, K70.4, K71.1, K72.1, K72.9, K76.5, K76.6, K76.7                                                     |  |
| Any malignancy, including lymphoma and leukemia, except malignant neoplasm of skin | 140.x–172.x, 174.x–195.8, 200.x–208.x, 238.6              | C00.x–C26.x, C30.x–C34.x, C37.x–C41.x, C43.x, C45.x–C58.x, C60.x–C76.x, C81.x–C85.x, C88.x, C90.x–C97.x                         |  |
| Metastatic solid tumor                                                             | 196.x–199.x                                               | C77.x–C80.x                                                                                                                     |  |
| Human immunodeficiencyvirus infection                                              | 042.x–044.x                                               | B20.x–B22.x, B24.x                                                                                                              |  |
| Anemia                                                                             | 280-285                                                   | D46.1, D46.4, D50-D64                                                                                                           |  |
| Rheumatic disease                                                                  | 446.5, 710.0–710.4, 714.0–714.2, 714.8, 725.x             | M05.x, M06.x, M31.5, M32.x–M34.x, M35.1, M35.3, M36.0                                                                           |  |
| Chronic kidney disease                                                             | 580, 581, 582, 583, 584, 585, 586, 587, 588, 589          | I12, I13, N00-N05, N07, N11, N14, N17, N18, N19, Q61                                                                            |  |
| Bone Fractures due to traffic accidents                                            | 800-829, E800-E848                                        |                                                                                                                                 |  |
| <b>Major bleeding</b>                                                              |                                                           |                                                                                                                                 |  |
| Intracranial                                                                       | 430, 431, 432.0, 432.1, 432.9, 852.0, 852.2, 852.4, 853.0 | I60, I61, I62, S06.340A-S06.349A, S06.350A-S06.359A, S06.360A-S06.369A, S06.4X0A-S06.4X9A, S06.5X0A-S06.5X9A, S06.6X0A-S06.6X9A |  |

|                              |                                                                                                                                                                                                                                                   |                                                                                                                                                                                                                                     |  |
|------------------------------|---------------------------------------------------------------------------------------------------------------------------------------------------------------------------------------------------------------------------------------------------|-------------------------------------------------------------------------------------------------------------------------------------------------------------------------------------------------------------------------------------|--|
| Gastrointestinal             | 530.7, 531, 531.2, 531.4, 531.6, 532, 532.2, 532.4, 532.6, 533, 533.2, 533.4, 533.6, 534, 534.2, 534.4, 534.6, 569.3, 535.01, 535.11, 535.21, 535.31, 535.41, 535.51, 535.61, 535.71, 537.83, 537.84, 562.02, 562.03, 562.12, 562.13, 569.85, 578 | K22.6, K25-K28, K29.01, K29.21, K29.31, K29.41, K29.51, K29.61, K29.71, K29.81, K29.91, K31.811, K31.82, K52.81, K55.21, K56.60, K57.01, K57.11, K57.13, K57.21, K57.31, K57.33, K57.81, K57.91, K57.93, K62.5, K92.0, K92.1, K92.2 |  |
| Genitourinary tract bleeding | 599.7, 626.8                                                                                                                                                                                                                                      | R31.9, N93.8, N93.8                                                                                                                                                                                                                 |  |
| Other sites                  | 336.1, 363.6, 372.72, 376.32, 377.42, 379.23 (eye); 459, 593.81, 719.1 (joint); 729.92 (soft tissue); 423.0 (heart), 772.5 (adrenal gland)                                                                                                        | G95.11, G95.19, H05.23, H11.3, H31.3, H43.1, H47.02, I31.2, M25.0 R58<br>S37.012A, S37.019A, S37.021A, S37.022A, S37.029A, S37.031A, S37.032A, S37.039A, S37.041A, S37.042A, S37.049A, S37.051A, S37.052A, S37.059A                 |  |

## Supplementary Figure

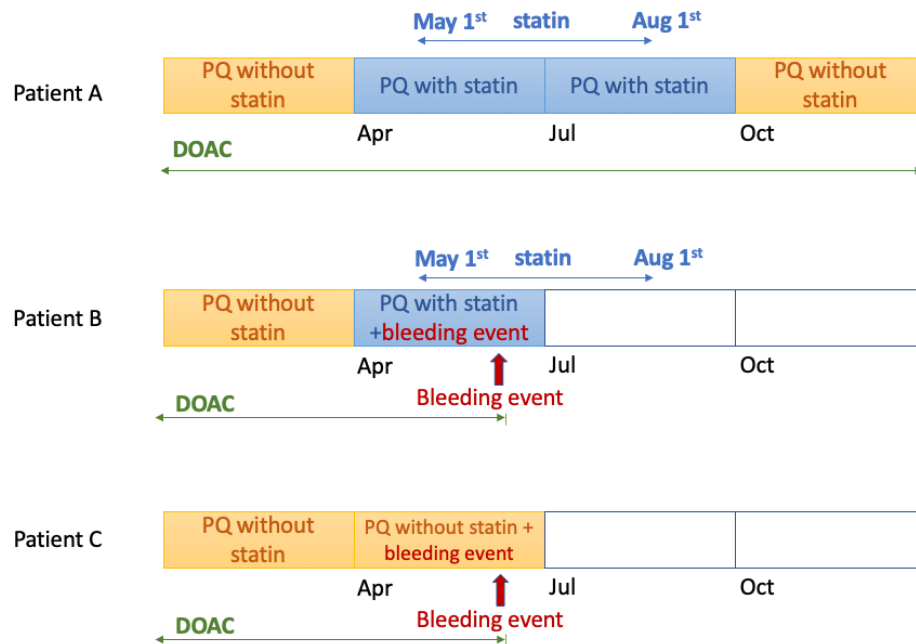

### Supplement Figure. Illustration of Person-quarter Examples.

Examples of person-quarters (PQs) counting. In this year, patient A had two person-quarters of direct oral anticoagulant (DOAC) exposure without concurrent statin use, and two person-quarters of DOAC and statin exposure; patient B has one person-quarter of DOAC without concurrent statin and one person-quarter of DOAC with concurrent statin and bleeding event; patient C has two person-quarters of DOAC without concurrent statin; bleeding event occurred in one person-quarter. Within the PQ, the time-points of DOAC prescription, statin prescription, and bleeding events were all recorded, as to ensure that only bleeding events after DOAC prescription were counted, and only bleedings after statin prescription were recorded as bleeding events with statin using.
